# Supplementary material for: Pore-structure-directed CO2 electroreduction to formate on SnO2/C catalysts
Source: Royal Society of Chemistry journal article supplement (doi:10.1039/c9ta05937g), 2019-01-01
Supplement: c9ta05937g1.pdf [file c9ta05937g1.pdf]

## Electronic Supplementary Information

### **Pore-Structure-Directed CO<sub>2</sub> Electroreduction to Formate on SnO<sub>2</sub>/C Catalysts**

Yeheng He,<sup>a</sup> Wen-Jie Jiang,<sup>\*a</sup> Yun Zhang,<sup>ab</sup> Lin-Bo Huang,<sup>a</sup> and Jin-Song Hu<sup>\*ac</sup>

<sup>a</sup> Beijing National Laboratory for Molecular Sciences (BNLMS), CAS Key Laboratory of Molecular Nanostructure and Nanotechnology, Institute of Chemistry, Chinese Academy of Sciences (CAS), Beijing 100190, China

<sup>b</sup> College of Chemistry and Materials Science, Sichuan Normal University, Chengdu, 610068, China

<sup>c</sup> University of Chinese Academy of Sciences, Beijing 100049, China

\* Corresponding Authors. Email: jiangwenjie@iccas.ac.cn, hujs@iccas.ac.cn

This file includes Fig. S1-S11 and Table S1-S2

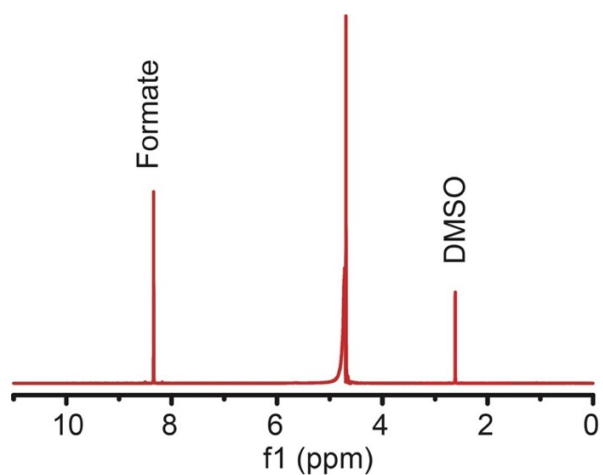

**Fig. S1** NMR spectrum of the cathodic electrolyte after 1 h of CO<sub>2</sub> reduction at -1.16 V.

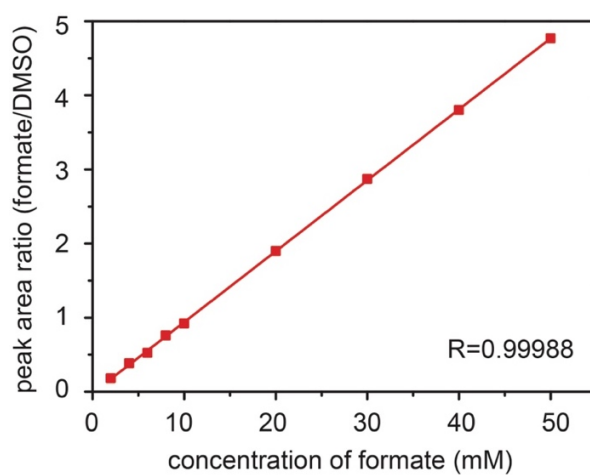

**Fig. S2** The calibration curve for formate with different concentrations.

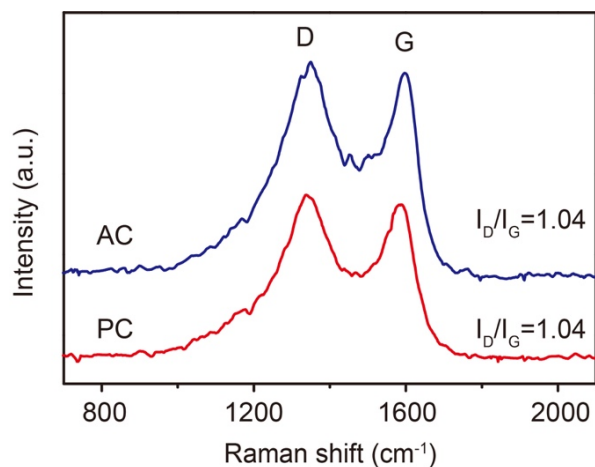

**Fig. S3** The Raman spectra for PC and AC.

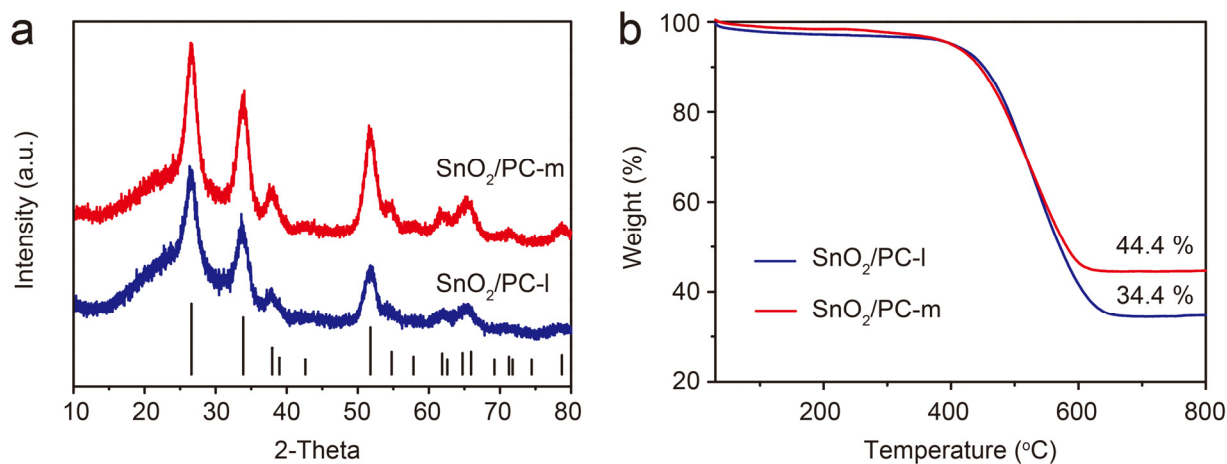

**Fig. S4** (a) XRD patterns and (b) TG curves of SnO<sub>2</sub>/PC with lower feeding amount of stannous chloride (0.02 mM, denoted as SnO<sub>2</sub>/PC-m) and higher feeding amount of stannous chloride (0.04 mM, denoted as SnO<sub>2</sub>/PC-l).

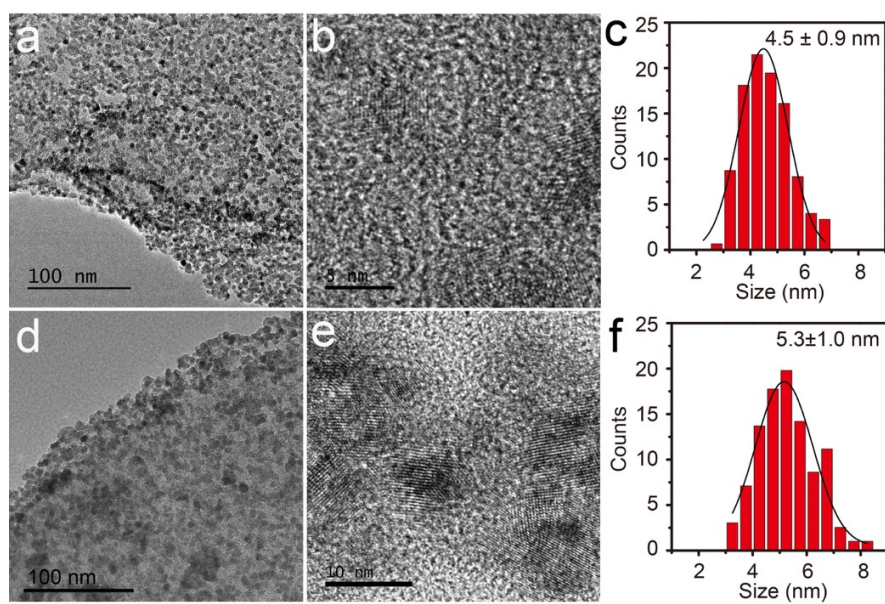

**Fig. S5** TEM images and size distributions of SnO<sub>2</sub>/PC with (a-c) lower feeding amount of stannous chloride (0.02 mM) and (d-f) higher feeding amount of stannous chloride (0.04 mM).

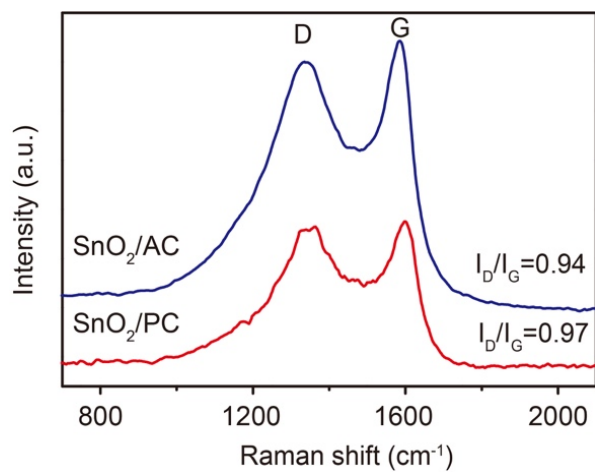

**Fig. S6** The Raman spectra for SnO<sub>2</sub>/PC and SnO<sub>2</sub>/AC.

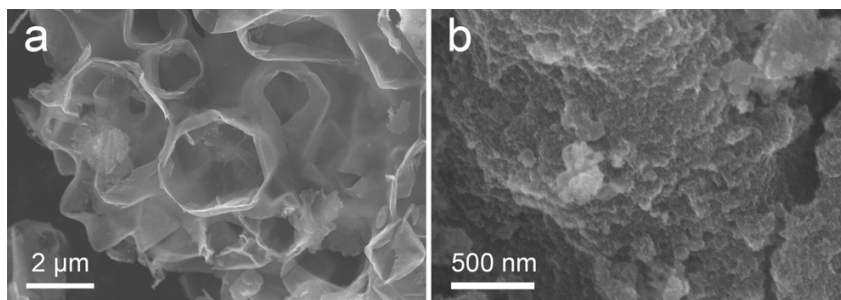

**Fig. S7** SEM images of (a) SnO<sub>2</sub>/PC and (b) SnO<sub>2</sub>/AC.

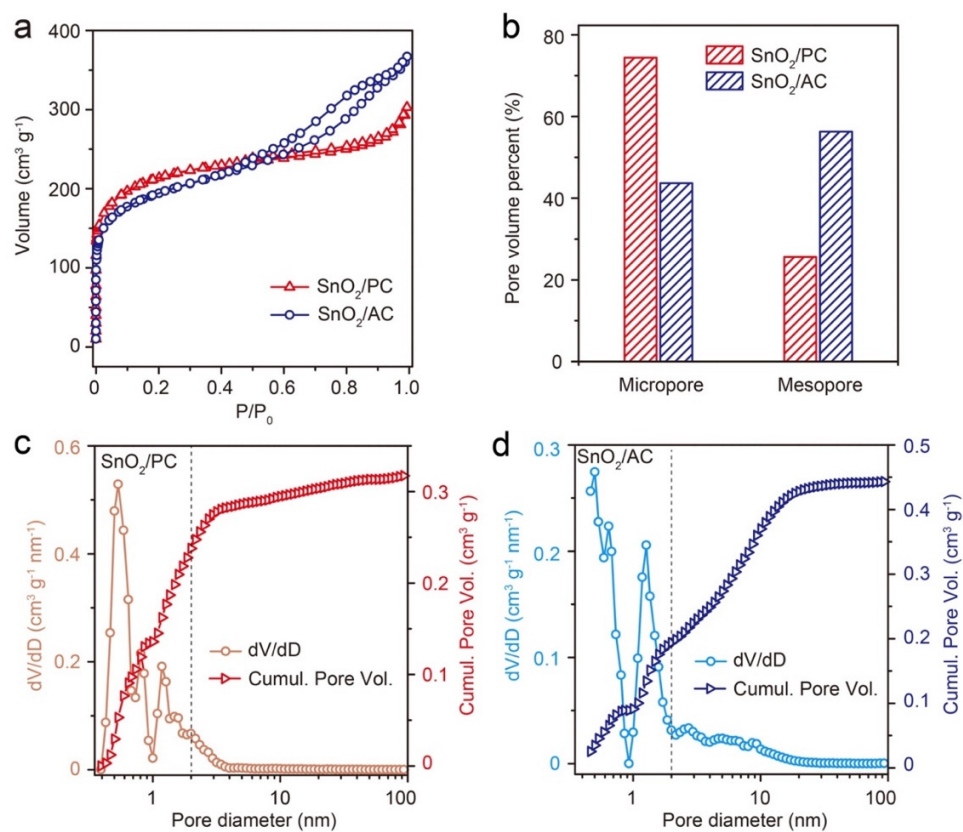

**Fig. S8** (a) Nitrogen sorption isotherms and (b) micropore and mesopore volume distribution for SnO<sub>2</sub>/PC and SnO<sub>2</sub>/AC; (c) pore size distribution for SnO<sub>2</sub>/PC and (d) pore size distribution for SnO<sub>2</sub>/AC.

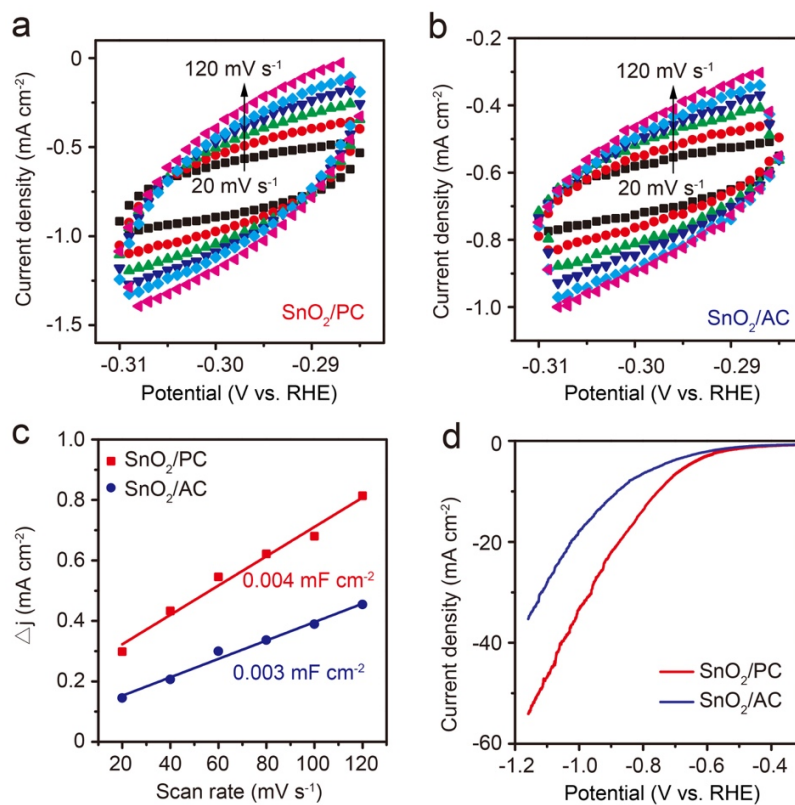

**Fig. S9** CVs of (a) SnO<sub>2</sub>/PC and (b) SnO<sub>2</sub>/AC at different scan rates from 20 to 120 mV s<sup>-1</sup>; (c) Plots of current density as a function of scan rate and (d) LSV curves normalized by ECSA of SnO<sub>2</sub>/PC and SnO<sub>2</sub>/AC.

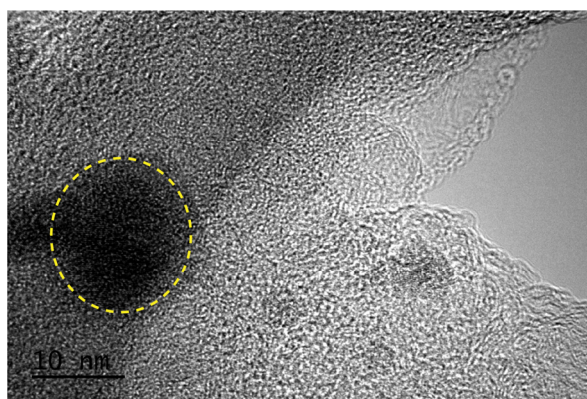

**Fig. S10** TEM image of SnO<sub>2</sub>/PC after 10 h electrolysis.

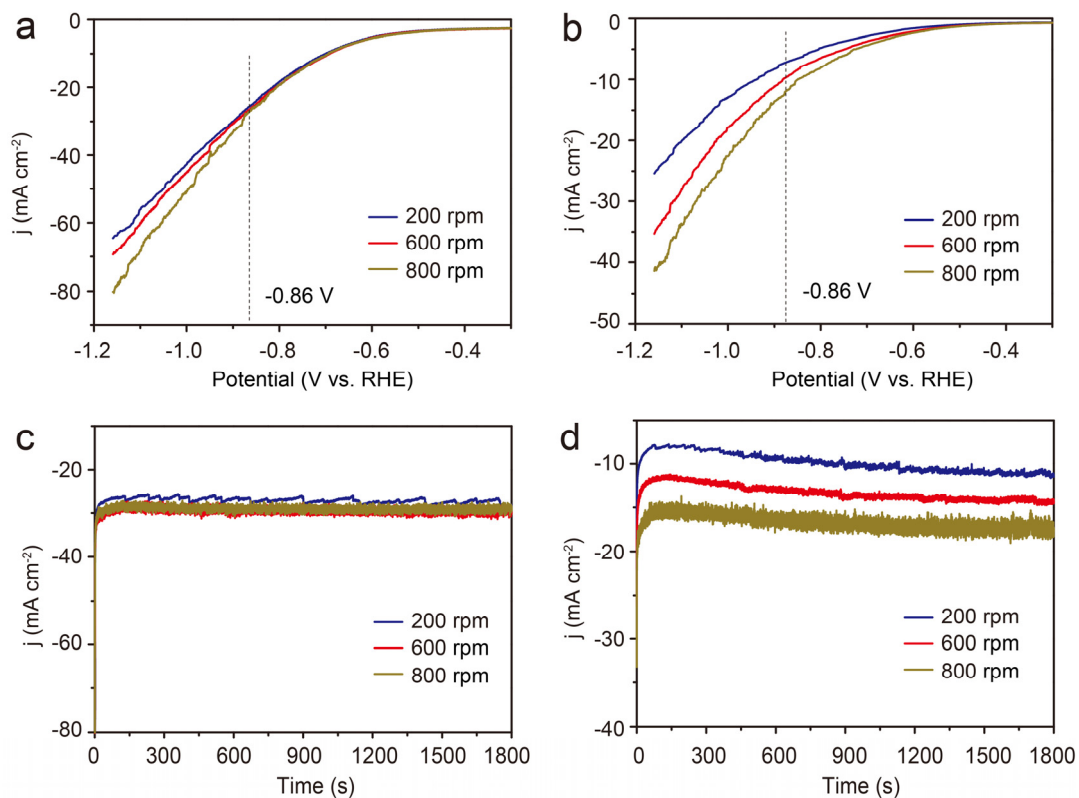

**Fig. S11** LSV of the CO<sub>2</sub> electroreduction under different rotation speed for (a) SnO<sub>2</sub>/PC and (b) SnO<sub>2</sub>/AC; Current versus time curve under different rotation speed of (c) SnO<sub>2</sub>/PC and (d) SnO<sub>2</sub>/AC in CO<sub>2</sub>-saturated 0.5 M KHCO<sub>3</sub> aqueous solution at applied potential of -0.86 V for 0.5 h.

**Table S1** BET surface area and pore volume of PC, SnO<sub>2</sub>/PC, AC and SnO<sub>2</sub>/AC.

| Sample                               | PC   | SnO <sub>2</sub> /PC | AC   | SnO <sub>2</sub> /AC |
|--------------------------------------|------|----------------------|------|----------------------|
| BET surface area (m <sup>2</sup> /g) | 1268 | 788                  | 1185 | 714                  |
| Pore volume (m <sup>2</sup> /g)      | 0.73 | 0.47                 | 0.98 | 0.57                 |



**Table S2** Comparison of the electrocatalytic performance for reducing CO<sub>2</sub> to formate on different catalysts and electrolytes.

| Catalysts                             | Electrolyte              | E (V) <sup>[a]</sup> | $j^{\text{total}}$ (mA cm <sup>-2</sup> ) <sup>[b]</sup> | FE <sub>formate</sub> <sup>[c]</sup> | Ref.      |
|---------------------------------------|--------------------------|----------------------|----------------------------------------------------------|--------------------------------------|-----------|
| <b>SnO<sub>2</sub>/porous C</b>       | 0.5 M KHCO <sub>3</sub>  | -0.86 vs. RHE        | 32                                                       | 92%                                  | This work |
| <b>Sn GDE<sup>[d]</sup></b>           | 0.5 M KHCO <sub>3</sub>  | -1.8 vs. Ag/AgCl     | 13.45                                                    | 73%                                  | 1         |
| <b>Sn GDE</b>                         | 0.5 M KHCO <sub>3</sub>  | -1.8 vs. Ag/AgCl     | 22.2                                                     | 78.6%                                | 2         |
| <b>Sn foil</b>                        | 0.1 M KHCO <sub>3</sub>  | -1.8 vs. Ag/AgCl     | 2.5                                                      | 91%                                  | 3         |
| <b>Sn foil</b>                        | 0.5 M KHCO <sub>3</sub>  | -2.0 vs. SCE         | 28                                                       | 63.5%                                | 4         |
| <b>SnO<sub>2</sub></b>                | 0.5 M NaOH               | -0.6 vs. RHE         | 3.5                                                      | 67.6%                                | 5         |
| <b>Sn/SnO<sub>x</sub>/Ti foil</b>     | 0.5M NaHCO <sub>3</sub>  | -0.7 vs. RHE         | ~2                                                       | ~38%                                 | 6         |
| <b>Sn-Carbon Nanofiber</b>            | 0.5 M KHCO <sub>3</sub>  | -0.8 vs. RHE         | 17.74                                                    | 62%                                  | 7         |
| <b>SnO<sub>2</sub>/graphene</b>       | 0.1 M NaHCO <sub>3</sub> | -1.8 vs. SCE         | 10.2                                                     | 93.6%                                | 8         |
| <b>SnO<sub>x</sub>/carbon black</b>   | 0.1 M NaHCO <sub>3</sub> | -1.16 vs. RHE        | 5.4                                                      | 86%                                  | 8         |
| <b>Electrodeposited Sn</b>            | 0.1 M KHCO <sub>3</sub>  | -1.4 vs. SCE         | 15                                                       | 91%                                  | 9         |
| <b>Sn dendrite</b>                    | 0.1 M KHCO <sub>3</sub>  | -1.36 vs. RHE        | 17.1                                                     | 71.6%                                | 10        |
| <b>Sn foam</b>                        | 0.1 M NaHCO <sub>3</sub> | -2.0 vs. Ag/AgCl     | 23.5                                                     | 90%                                  | 11        |
| <b>Sn/Nafion GDE</b>                  | 0.5 M NaHCO <sub>3</sub> | -1.6 vs. NHE         | 27                                                       | 70%                                  | 12        |
| <b>Porous Sn Nanowires</b>            | 0.1 M KHCO <sub>3</sub>  | -0.8 vs. RHE         | 6                                                        | 80.1%                                | 4         |
| <b>Ag-Sn core-shell Nanoparticles</b> | 0.5 M NaHCO <sub>3</sub> | -0.8 vs. RHE         | 19.5                                                     | 80%                                  | 13        |

[a] applied potential at the maximum FE<sub>formate</sub>; [b] Total current density at the maximum FE<sub>formate</sub>; [c] Maximum FE<sub>formate</sub>; [d] Gas diffusion electrode.

## REFERENCES

- 1 Q. Wang, H. Dong and H. Yu, *RSC Adv.*, 2014, **4**, 59970-59976.
- 2 Q. Wang, H. Dong and H. Yu, *J. Power Sources*, 2014, **271**, 278-284.
- 3 W. Lv, R. Zhang, P. Gao and L. Lei, *J. Power Sources*, 2014, **253**, 276-281.
- 4 B. Kumar, V. Atla, J. P. Brian, S. Kumari, T. Q. Nguyen, M. Sunkara and J. M. Spurgeon, *Angew. Chem. Int. Ed.*, 2017, **56**, 3645-3649.
- 5 S. Lee, J. D. Ocon, Y.-i. Son and J. Lee, *J. Phys. Chem. C*, 2015, **119**, 4884-4890.
- 6 Y. Chen and M. W. Kanan, *J. Am. Chem. Soc.*, 2012, **134**, 1986-1989.
- 7 Y. Zhao, J. Liang, C. Wang, J. Ma and G. G. Wallace, *Adv. Energy Mater.*, 2018, **8**, 1702524.
- 8 S. Zhang, P. Kang and T. J. Meyer, *J. Am. Chem. Soc.*, 2014, **136**, 1734-1737.
- 9 C. Zhao and J. Wang, *Chem. Eng. J.*, 2016, **293**, 161-170.
- 10 H. Won da, C. H. Choi, J. Chung, M. W. Chung, E. H. Kim and S. I. Woo, *ChemSusChem*, 2015, **8**, 3092-3098.
- 11 D. Du, R. Lan, J. Humphreys, S. Sengodan, K. Xie, H. Wang and S. Tao 2016, **1**, 1711-1715.
- 12 G. K. S. Prakash, F. A. Viva and G. A. Olah, *J. Power Sources*, 2013, **223**, 68-73.
- 13 W. Luc, C. Collins, S. Wang, H. Xin, K. He, Y. Kang and F. Jiao, *J. Am. Chem. Soc.*, 2017, **139**, 1885-1893.
